# Supplementary material
Source: publisher figshare collection journal article supplement (https://tandf.figshare.com/articles/dataset/_/9969581)
Supplement: Supplementary file 1 [file 1]

**Supplementary Figure 1.** Micrograph showing representative cell morphology of the used cell line. (a) Micrograph showing representative morphology of the used human amniotic membrane-derived stem cells (bcellbio-hAM-00) cultured for 3 days. (b) Representative morphology of human colorectal adenocarcinoma cells (ATCC® CCL-227™). (c) Representative morphology of CCD-18 Co normal colon fibroblasts (ATCC® CRL-1459™).

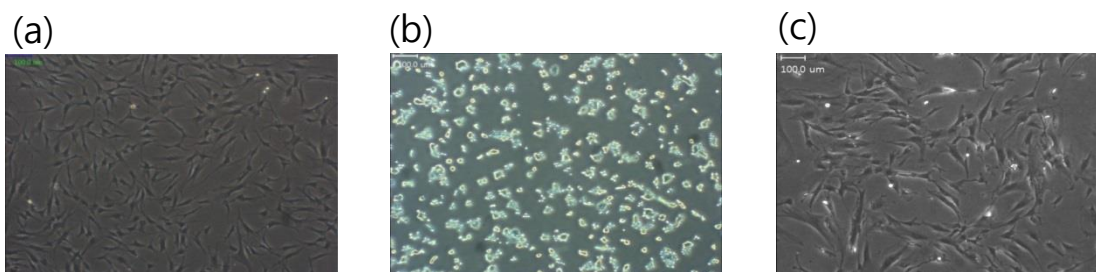

**Supplementary Figure 2.** Effect of MSC-CRC and conditioned medium (CM) on the proliferation of MSCs. (a) Cell proliferation between MSC-CRC group and CRC-CM group were compared after 48 hours. Cell proliferation rate was counted using a microscope and compared with the control group. Proliferation rate was increased in the MSC-CRC group and this not observed in the MSC-CM group. (b) Cell proliferation rate was measured 48 h after treatment with concentrated MSC-CRC CM (1–200  $\mu\text{g/mL}$ ). MSC groups treated with cancer-CM of 50 and 100  $\mu\text{g/mL}$  concentrations were the only ones that showed significantly enhanced proliferation. (c) The cell proliferation rate was measured 48 h after concentrated MSC-CM (1–200  $\mu\text{g/mL}$ ) treatment. 100  $\mu\text{g/mL}$  concentration of CM was observed to be the most effective. Serum-free culture medium was used as a negative control and EGF was used as a positive control. Error bars represent three independent experiments carried out in triplicate (Statistical analysis was performed by ANOVA with Tukey's multiple comparison test. \* $p < 0.05$ , \*\* $p < 0.01$ , \*\*\* $p < 0.001$ ).

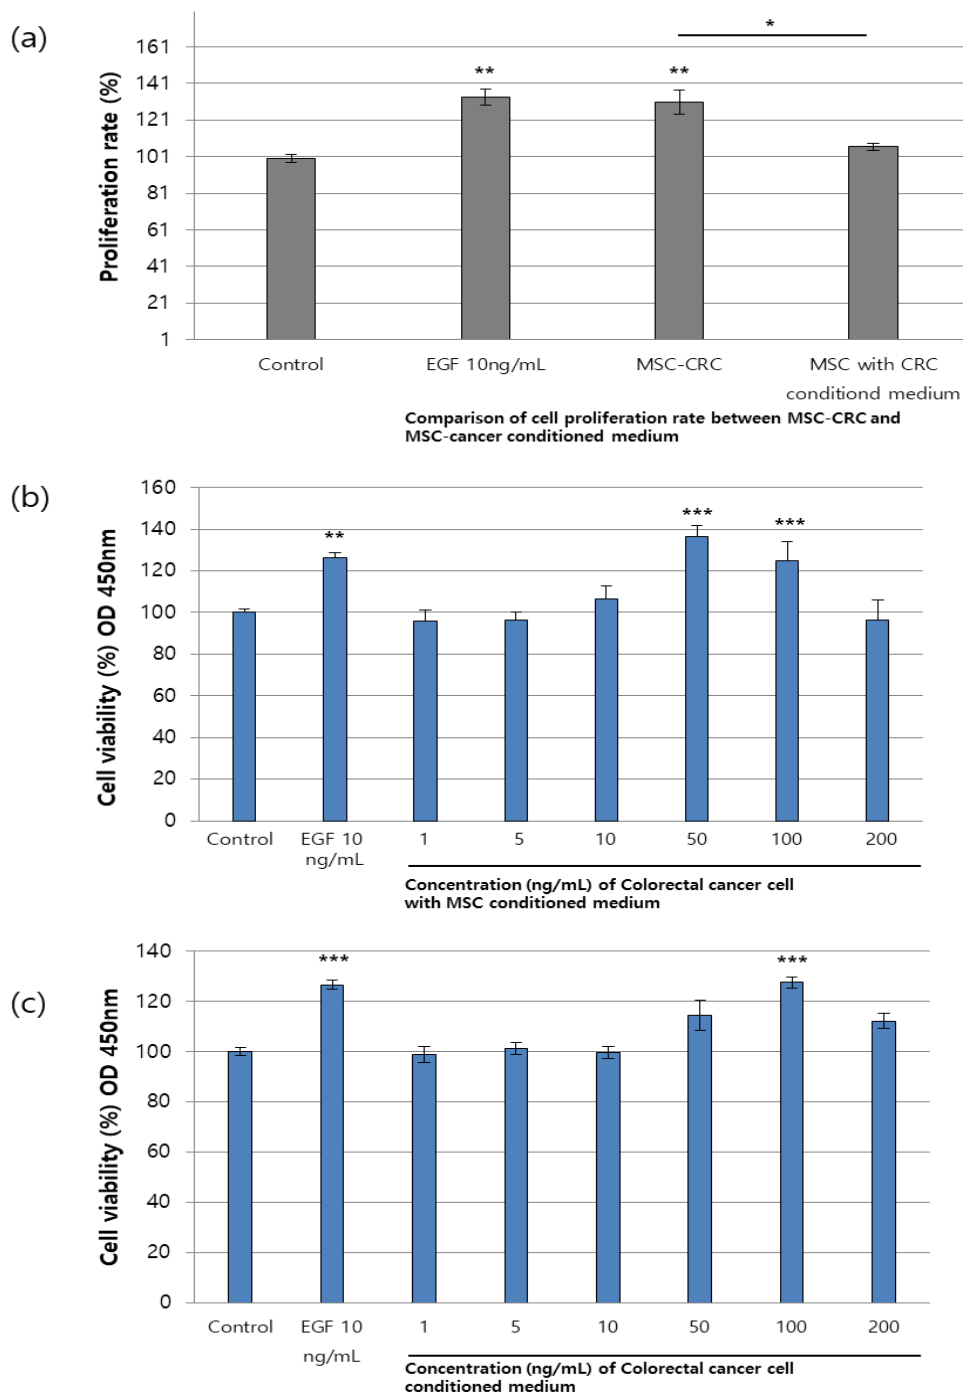

**Supplementary Figure 3.** Schematic diagram. The schematic diagram shows the tumor development with the following two roles of the MSC changed by the colorectal cancer cells. (a) Extension of tumor stromal cells for more factor supply. (b) Integration with cancer cells.

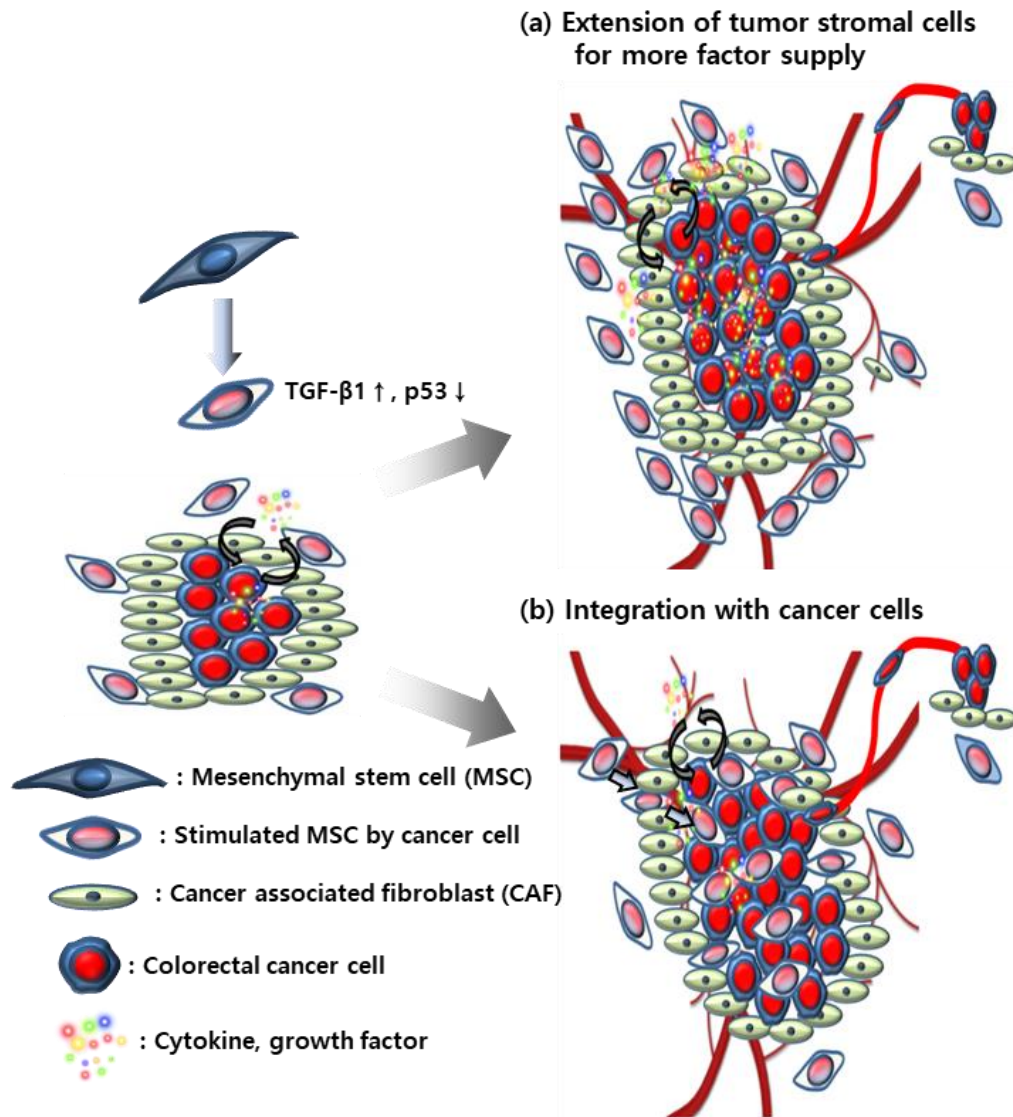

**Supplementary Table 1.** List of genes present in the microarray gene datasets and reported in literature to be involved in cancer association. Fold change (FC) represents increasing events in the MSC-CRC sample when compared to the MSC-A sample.

## p53

| Gene Accession  | Gene Symbol | Gene Description                                                                                 | FC<br>(fold change) | P Value  |
|-----------------|-------------|--------------------------------------------------------------------------------------------------|---------------------|----------|
| NM_001031685    | TP53BP2     | tumor protein p53 binding protein, 2                                                             | 1.695588            | 0.004342 |
| NM_001251964    | TP53AIP1    | tumor protein p53 regulated apoptosis inducing protein 1                                         | 1.378506            | 0.874367 |
| NM_016058       | TPRKB       | TP53RK binding protein                                                                           | -1.2528             | 0.932319 |
| NM_000546       | TP53        | tumor protein p53                                                                                | -1.26064            | 0.394961 |
| ENST00000316024 | WRAP53      | WD repeat containing, antisense to TP53                                                          | -1.29272            | 0.696636 |
| NM_002393       | MDM4        | Mdm4 p53 binding protein homolog (mouse)                                                         | -1.30188            | 0.239469 |
| NM_001172477    | RRM2B       | ribonucleotide reductase M2 B (TP53 inducible)                                                   | -1.30568            | 0.387107 |
| NM_001258320    | TP53I11     | tumor protein p53 inducible protein 11                                                           | -1.31302            | 0.598831 |
| NM_022045       | MTBP        | Mdm2, transformed 3T3 cell double minute 2, p53 binding protein (mouse) binding protein, 104 kDa | -1.62813            | 0.011169 |
| ENST00000372114 | TP53RK      | TP53 regulating kinase                                                                           | -1.71391            | 0.021333 |
| ENST00000342697 | TP53INP1    | tumor protein p53 inducible nuclear protein 1                                                    | -1.7527             | 0.002458 |

## Tumor suppressor genes

| Gene Accession  | Gene Symbol | Gene Description                                              | FC       | P Value  |
|-----------------|-------------|---------------------------------------------------------------|----------|----------|
| ENST00000371953 | PTEN        | phosphatase and tensin homolog                                | -1.41238 | 0.028239 |
| NM_005418       | ST5         | suppression of tumorigenicity 5                               | -1.8249  | 0.003851 |
| NM_017744       | ST7L        | suppression of tumorigenicity 7 like                          | -1.43845 | 0.176188 |
| NM_007275       | TUSC2       | tumor suppressor candidate 2                                  | -1.34661 | 0.300948 |
| NM_145341       | PDCD4       | programmed cell death 4 (neoplastic transformation inhibitor) | -1.44278 | 0.001038 |

## Anti-oxidant genes

| Gene Accession  | Gene Symbol | Gene Description                            | FC       | P Value  |
|-----------------|-------------|---------------------------------------------|----------|----------|
| NM_002061       | GCLM        | glutamate-cysteine ligase, modifier subunit | -3.42147 | 8.66E-20 |
| NM_201397       | GPX1        | glutathione peroxidase 1                    | -1.5374  | 0.116637 |
| ENST00000320623 | NQO1        | NAD(P)H dehydrogenase, quinone 1            | -1.50795 | 9.02E-05 |
| NM_001752       | CAT         | catalase                                    | -1.36128 | 0.076412 |
| NM_001008397    | GPX8        | glutathione peroxidase 8 (putative)         | -1.35885 | 0.03716  |
| NM_001145412    | NFE2L2      | nuclear factor (erythroid-derived 2)-like 2 | -1.29909 | 0.236304 |

## Oncogenes

| Gene Accession  | Gene Symbol | Gene Description                                              | FC       | P Value  |
|-----------------|-------------|---------------------------------------------------------------|----------|----------|
| ENST00000371222 | JUN         | jun proto-oncogene                                            | 3.458496 | 0        |
| NM_001143820    | ETS1        | v-ets erythroblastosis virus E26 oncogene homolog 1 (avian)   | 3.097517 | 0        |
| NM_001127500    | MET         | met proto-oncogene (hepatocyte growth factor receptor)        | 2.800247 | 0        |
| NM_007314       | ABL2        | v-abl Abelson murine leukemia viral oncogene homolog 2        | 2.681566 | 1.11E-12 |
| NM_000222       | KIT         | v-kit Hardy-Zuckerman 4 feline sarcoma viral oncogene homolog | 2.238577 | 0.000202 |
| NM_004163       | RAB27B      | RAB27B, member RAS oncogene family                            | 2.194765 | 0.012712 |
| ENST00000257017 | RAB33A      | RAB33A, member RAS oncogene family                            | 2.165543 | 1.89E-05 |
| NM_170662       | CBLB        | Cbl proto-oncogene, E3 ubiquitin protein ligase B             | 2.121365 | 9.15E-12 |
| NM_001256295    | ETS2        | v-ets erythroblastosis virus E26 oncogene homolog 2 (avian)   | 1.990579 | 5.32E-08 |
| NM_005402       | RALA        | v-ral simian leukemia viral oncogene homolog A (ras related)  | 1.962577 | 0.004787 |
| ENST00000295025 | REL         | v-rel reticuloendotheliosis viral oncogene homolog (avian)    | 1.830371 | 4.72E-06 |
| NM_001172663    | RAB40C      | RAB40C, member RAS oncogene family                            | 1.666959 | 0.004254 |
| NM_017817       | RAB20       | RAB20, member RAS oncogene family                             | 1.66306  | 0.058073 |
| NM_002866       | RAB3A       | RAB3A, member RAS oncogene family                             | 1.470861 | 0.336716 |
| NM_006834       | RAB32       | RAB32, member RAS oncogene family                             | 1.433811 | 0.125178 |
| NM_006270       | RRAS        | related RAS viral (r-ras) oncogene homolog                    | 1.43294  | 0.001888 |

|              |         |                                                                  |          |          |
|--------------|---------|------------------------------------------------------------------|----------|----------|
| NM_005207    | CRKL    | v-crk sarcoma virus CT10 oncogene homolog (avian)-like           | 1.420233 | 0.017156 |
| NM_006875    | PIM2    | pim-2 oncogene                                                   | 1.414471 | 0.692839 |
| NR_000039    | RAB9BP1 | RAB9B, member RAS oncogene family pseudogene 1                   | 1.408603 | 0.501703 |
| NM_016277    | RAB23   | RAB23, member RAS oncogene family                                | 1.394545 | 0.011186 |
| NM_002360    | MAFK    | v-maf musculoaponeurotic fibrosarcoma oncogene homolog K (avian) | 1.378013 | 0.220002 |
| NM_001031834 | RAB40AL | RAB40A, member RAS oncogene family-like                          | 1.369403 | 0.962948 |
| NM_002867    | RAB3B   | RAB3B, member RAS oncogene family                                | 1.366038 | 0.070021 |
| NM_032846    | RAB2B   | RAB2B, member RAS oncogene family                                | 1.345272 | 0.14785  |
| NM_001001852 | PIM3    | pim-3 oncogene                                                   | 1.336936 | 0.262947 |
| NM_016322    | RAB14   | RAB14, member RAS oncogene family                                | 1.321471 | 0.049022 |
| NM_032711    | MAFG    | v-maf musculoaponeurotic fibrosarcoma oncogene homolog G (avian) | 1.312744 | 0.680149 |
| NM_005252    | FOS     | FBJ murine osteosarcoma viral oncogene homolog                   | 1.307629 | 0.758151 |
| NM_005354    | JUND    | jun D proto-oncogene                                             | 1.297015 | 0.261528 |

## Growth factors/etc

| Gene Accession  | Gene Symbol | Gene Description                                                    | FC       | P Value  |
|-----------------|-------------|---------------------------------------------------------------------|----------|----------|
| NM_002506       | NGF         | nerve growth factor (beta polypeptide)                              | 2.500558 | 8.78E-08 |
| NM_000660       | TGFB1       | transforming growth factor, beta 1                                  | 1.97916  | 9.85E-09 |
| NM_004750       | CRLF1       | cytokine receptor-like factor 1                                     | 1.721763 | 1.69E-06 |
| ENST00000361188 | PRC1        | protein regulator of cytokinesis 1                                  | 1.689911 | 0.006902 |
| NM_000601       | HGF         | hepatocyte growth factor (hepapoietin A; scatter factor)            | 1.65331  | 0.024311 |
| NM_004112       | FGF11       | fibroblast growth factor 11                                         | 1.586894 | 0.170769 |
| NM_002059       | GH2         | growth hormone 2                                                    | 1.540906 | 0.07246  |
| ENST00000275493 | EGFR        | epidermal growth factor receptor                                    | 1.53724  | 0.001064 |
| NM_001025366    | VEGFA       | vascular endothelial growth factor A                                | 2.718992 | 0        |
| NM_001243733    | VEGFB       | vascular endothelial growth factor B                                | 1.297331 | 0.421236 |
| NM_000963       | PTGS2       | prostaglandin-endoperoxide synthase 2                               | 2.174502 | 0        |
| NM_006516       | SLC2A1      | solute carrier family 2 (facilitated glucose transporter), member 1 | 6.590226 | 0        |

**Supplementary Table 2.** DAVID functional annotation bioinformatics by microarray analysis of the top significantly increased genes. 594 upregulated genes identified in our microarray data set were entered and all annotation categories were used (Only terms with Fold change  $\geq 1.5$ , p-value  $\leq 0.01$ ). Pathway enrichment analysis of the upregulated DEGs.

| Category     | Term                                                 | Count | %       | P Value  | Genes                                                                                                                                                                                                         | Benjamini | FDR      |
|--------------|------------------------------------------------------|-------|---------|----------|---------------------------------------------------------------------------------------------------------------------------------------------------------------------------------------------------------------|-----------|----------|
| KEGG_PATHWAY | hsa05322:Systemic lupus erythematosus                | 18    | 0.02092 | 4.65E-06 | HIST1H2AC, HIST2H2AA4, HIST1H2BC, HIST1H2BD, HIST1H2BG, HIST1H2AD, HIST1H2AE, HIST2H4B, HIST2H3D, HIST2H2AB, HIST1H2BM, HIST1H2BL, HIST2H2BE, HIST1H4B, HIST1H2AI, HIST1H3B, HIST1H4D, HIST1H3H               | 0.001013  | 0.005908 |
| KEGG_PATHWAY | hsa04141:Protein processing in endoplasmic reticulum | 20    | 0.02324 | 7.78E-06 | HERPUD1, HSP90AA1, CRYAB, RNF185, HSPA1A, HSPA1B, PDIA4, EDEM1, DDIT3, NGLY1, HYOU1, HSP90B1, HSPA2, HSPA4L, HSPA6, YOD1, HSPA5, DNAJB1, PPP1R15A, SEC61G                                                     | 8.48E-04  | 0.009893 |
| KEGG_PATHWAY | hsa05034:Alcoholism                                  | 20    | 0.02324 | 1.52E-05 | HIST1H2AC, HIST2H2AA4, HIST1H2BC, HIST1H2BD, HIST1H2BG, HIST1H2AD, HIST1H2AE, PPP1CB, HIST2H4B, HIST2H3D, HIST2H2AB, HIST1H2BM, HIST1H2BL, HIST2H2BE, HIST1H4B, HIST1H2AI, HIST1H3B, GNG2, HIST1H4D, HIST1H3H | 0.001107  | 0.019378 |
| KEGG_PATHWAY | hsa04710:Circadian rhythm                            | 8     | 0.00929 | 8.43E-05 | NR1D1, PRKAG2, PRKAB2, PER1, BHLHE40, RORA, PER3, BHLHE41                                                                                                                                                     | 0.004584  | 0.107104 |
| KEGG_PATHWAY | hsa04010:MAPK signaling pathway                      | 21    | 0.02440 | 6.45E-04 | EGFR, LAMTOR3, DUSP10, CACNB1, HSPA1A, HSPA1B, STK4, DDIT3, TGFB1, DUSP4, DUSP3, HSPA2, DUSP1, JUN, HSPA6, HSPB1, GADD45B, GADD45A, IL1A, RASA2, NGF                                                          | 0.027754  | 0.817179 |
| KEGG_PATHWAY | hsa04068:FoxO signaling pathway                      | 14    | 0.01627 | 9.20E-04 | EGFR, IRS2, PRKAB2, PRKAG2, SMAD4, BNIP3, CCNG2, STK4, TGFB1, S1PR1, PLK1, FBXO32, GADD45B, GADD45A                                                                                                           | 0.032899  | 1.163472 |
| KEGG_PATHWAY | hsa05230:Central carbon metabolism in cancer         | 9     | 0.01046 | 0.00182  | EGFR, PDK1, SLC2A1, MET, PGAM1, HK2, PFKP, KIT, SLC7A5                                                                                                                                                        | 0.055138  | 2.288258 |
| KEGG_PATHWAY | hsa04066:HIF-1 signaling pathway                     | 11    | 0.01278 | 0.002088 | EGFR, PDK1, PFKFB3, HMOX1, VEGFA, SLC2A1, SERPINE1, ENO2, HK2, IL6R, ENO1                                                                                                                                     | 0.055363  | 2.62164  |
| KEGG_PATHWAY | hsa00010:Glycolysis / Gluconeogenesis                | 8     | 0.00929 | 0.009398 | LDHA, ALDOC, ENO2, PGAM1, HK2, PFKP, PGK1, ENO1                                                                                                                                                               | 0.204453  | 11.31011 |
| KEGG_PATHWAY | hsa04350:TGF-beta signaling pathway                  | 9     | 0.01046 | 0.009753 | INHBB, INHBA, NOG, SMAD9, ID2, ID1, SMAD4, ID3, TGFB1                                                                                                                                                         | 0.19238   | 11.71309 |
| KEGG_PATHWAY | hsa04152:AMPK signaling pathway                      | 11    | 0.01278 | 0.012053 | IRS2, CAB39L, TSC1, PFKFB4, PFKFB3, SCD, PRKAG2, PRKAB2, GYS1, PFKP, CCNA2                                                                                                                                    | 0.213627  | 14.2844  |
| KEGG_PATHWAY | hsa01230:Biosynthesis of amino acids                 | 8     | 0.00929 | 0.013712 | ARG2, ALDOC, ENO2, PGAM1, PFKP, PGK1, PRPS1, ENO1                                                                                                                                                             | 0.221839  | 16.09563 |
| KEGG_PATHWAY | hsa05203:Viral carcinogenesis                        | 15    | 0.01743 | 0.014441 | HIST1H2BC, HIST1H2BD, VAC14, HIST1H2BG, HIST2H4B, HIST1H2BM, REL, HIST1H2BL, HIST1H4B, HIST2H2BE, JUN, HIST1H4D, RBPJ, CCNA2, RASA2                                                                           | 0.216453  | 16.8803  |
| KEGG_PATHWAY | hsa04320:Dorso-ventral axis formation                | 5     | 0.00581 | 0.014455 | EGFR, ETS1, ETS2, SPIRE1, CPEB1                                                                                                                                                                               | 0.202863  | 16.89576 |
| KEGG_PATHWAY | hsa04931:Insulin resistance                          | 10    | 0.01162 | 0.01451  | IRS2, PPP1R3C, PPP1R3B, PRKAG2, PRKAB2, SLC2A1, MGEA5, GYS1, TRIB3, PPP1CB                                                                                                                                    | 0.191382  | 16.95503 |
| KEGG_PATHWAY | hsa04915:Estrogen signaling pathway                  | 9     | 0.01046 | 0.024364 | EGFR, HSP90B1, HSP90AA1, PLCB4, HSPA2, JUN, HSPA6, HSPA1A, HSPA1B                                                                                                                                             | 0.285424  | 26.91254 |
| KEGG_PATHWAY | hsa00051:Fructose and mannose metabolism             | 5     | 0.00581 | 0.025802 | PFKFB4, PFKFB3, ALDOC, HK2, PFKP                                                                                                                                                                              | 0.284813  | 28.27001 |
| KEGG_PATHWAY | hsa00500:Starch and sucrose metabolism               | 5     | 0.00581 | 0.028565 | GBE1, ENPP1, GYS1, HK2, PGM2L1                                                                                                                                                                                | 0.296007  | 30.81336 |
| KEGG_PATHWAY | hsa05211:Renal cell carcinoma                        | 7     | 0.00813 | 0.029376 | ETS1, JUN, VEGFA, SLC2A1, MET, FLCN, TGFB1                                                                                                                                                                    | 0.289727  | 31.54467 |
| KEGG_PATHWAY | hsa04014:Ras signaling pathway                       | 15    | 0.01743 | 0.030583 | EGFR, MET, KIT, STK4, RASA4B, REL, ETS1, ETS2, VEGFA, RALA, GNG2, RASA4, ABL2, RASA2, NGF                                                                                                                     | 0.287204  | 32.61858 |
| KEGG_PATHWAY | hsa01200:Carbon metabolism                           | 9     | 0.01046 | 0.047903 | MUT, ALDOC, ENO2, PGAM1, HK2, PFKP, PGK1, PRPS1, ENO1                                                                                                                                                         | 0.399255  | 46.41749 |
| KEGG_PATHWAY | hsa04150:mTOR signaling pathway                      | 6     | 0.00697 | 0.054624 | CAB39L, TSC1, RICTOR, RRAAGD, DDIT4, RRAAGC                                                                                                                                                                   | 0.426858  | 51.03159 |
| KEGG_PATHWAY | hsa04910:Insulin signaling pathway                   | 10    | 0.01162 | 0.057334 | IRS2, CBLB, PPP1R3C, PPP1R3B, TSC1, PRKAG2, PRKAB2, GYS1, HK2, PPP1CB                                                                                                                                         | 0.428578  | 52.786   |
| KEGG_PATHWAY | hsa05410:Hypertrophic                                | 7     | 0.00813 | 0.058687 | ITGA5, PRKAG2, PRKAB2, CACNB1, ITGA1, ITGB3, TGFB1                                                                                                                                                            | 0.422677  | 53.64003 |

|              |                                                                     |    |          |          |                                                                                                                                             |          |          |
|--------------|---------------------------------------------------------------------|----|----------|----------|---------------------------------------------------------------------------------------------------------------------------------------------|----------|----------|
|              | cardiomyopathy (HCM)                                                |    |          |          |                                                                                                                                             |          |          |
| KEGG_PATHWAY | hsa04922:Glucagon signaling pathway                                 | 8  | 0.009298 | 0.062398 | LDHA, PLCB4, PRKAG2, PRKAB2, SLC2A1, GYS1, PGAM1, SIK1                                                                                      | 0.429834 | 55.91041 |
| KEGG_PATHWAY | hsa05200:Pathways in cancer                                         | 21 | 0.024406 | 0.066801 | GNA13, EGFR, HSP90AA1, PTGS2, MET, SMAD4, BDKRB1, KIT, STK4, TGFB1, LAMA1, HSP90B1, CBLB, PLCB4, ETS1, JUN, SLC2A1, VEGFA, CKS2, RALA, GNG2 | 0.439925 | 58.47083 |
| KEGG_PATHWAY | hsa01130:Biosynthesis of antibiotics                                | 13 | 0.015109 | 0.075308 | LDHA, ALDOC, PFKP, HK2, PGAM1, UAP1L1, AK4, AMPD3, ARG2, ENO2, PGK1, ENO1, PRPS1                                                            | 0.468557 | 63.03442 |
| KEGG_PATHWAY | hsa04640:Hematopoietic cell lineage                                 | 7  | 0.008135 | 0.089152 | CD55, ITGA5, ITGA1, IL6R, KIT, ITGB3, IL1A                                                                                                  | 0.516653 | 69.48367 |
| KEGG_PATHWAY | hsa05120:Epithelial cell signaling in Helicobacter pylori infection | 6  | 0.006973 | 0.0895   | ATP6V1C1, EGFR, JUN, MET, ATP6V1H, ATP6V1B2                                                                                                 | 0.505804 | 69.63155 |
| KEGG_PATHWAY | hsa05323:Rheumatoid arthritis                                       | 7  | 0.008135 | 0.092985 | ATP6V1C1, JUN, VEGFA, ATP6V1H, ATP6V1B2, TGFB1, IL1A                                                                                        | 0.507962 | 71.07647 |

**Supplementary Table 3.** List of heat shock proteins up-/downregulated in the microarray datasets. Fold change (FC) represents increasing or decreasing events in MSC-CRC sample when compared with the MSC-A sample.

### Heat shock proteins

| Gene Accession                   | Gene Symbol    | Gene Description                                                          | FC       | P Value  |
|----------------------------------|----------------|---------------------------------------------------------------------------|----------|----------|
| ENST00000430065                  | HSPA1B//HSPA1A | heat shock 70 kDa protein 1B//heat shock 70 kDa protein 1A                | 12.64146 | 0        |
| ENST00000450744//ENST00000450744 | HSPA1B//HSPA1A | heat shock 70 kDa protein 1B//heat shock 70 kDa protein 1A                | 12.60295 | 0        |
| NM_005345                        | HSPA1A         | heat shock 70 kDa protein 1A                                              | 12.142   | 0        |
| ENST00000391555//ENST00000391555 | HSPA1B//HSPA1A | heat shock 70 kDa protein 1B//heat shock 70 kDa protein 1A                | 11.96903 | 0        |
| ENST00000542758//ENST00000542758 | HSPA1B//HSPA1A | heat shock 70 kDa protein 1B//heat shock 70 kDa protein 1A                | 11.8167  | 0        |
| ENST00000430065//ENST00000430065 | HSPA1B//HSPA1A | heat shock 70 kDa protein 1B//heat shock 70 kDa protein 1A                | 11.56249 | 0        |
| ENST00000430065//ENST00000430065 | HSPA1B//HSPA1A | heat shock 70 kDa protein 1B//heat shock 70 kDa protein 1A                | 11.56249 | 0        |
| ENST00000430065//ENST00000430065 | HSPA1B//HSPA1A | heat shock 70 kDa protein 1B//heat shock 70 kDa protein 1A                | 11.56249 | 0        |
| NM_005346                        | HSPA1B         | heat shock 70 kDa protein 1B                                              | 10.85055 | 0        |
| ENST00000450744//ENST00000450744 | HSPA1B//HSPA1A | heat shock 70 kDa protein 1B//heat shock 70 kDa protein 1A                | 10.34194 | 0        |
| AK023317                         | HSPA9          | heat shock 70 kDa protein 9 (mortalin)                                    | 4.200864 | 0        |
| NM_005347                        | HSPA5          | heat shock 70 kDa protein 5 (glucose-regulated protein, 78 kDa)           | 3.312828 | 0        |
| NM_002155                        | HSPA6          | heat shock 70 kDa protein 6 (HSP70B')                                     | 2.317163 | 0.008745 |
| NM_014424                        | HSPB7          | heat shock 27 kDa protein family, member 7 (cardiovascular)               | 1.988287 | 0.000249 |
| NR_024151                        | HSPA7          | heat shock 70 kDa protein 7 (HSP70B)                                      | 1.798068 | 0.046102 |
| NM_003299                        | HSP90B1        | heat shock protein 90 kDa beta (Grp94), member 1                          | 1.785849 | 1.01E-13 |
| NM_001017963                     | HSP90AA1       | heat shock protein 90 kDa alpha (cytosolic), class A member 1             | 1.739017 | 0.00059  |
| NM_014278                        | HSPA4L         | heat shock 70 kDa protein 4-like                                          | 1.716419 | 0.008524 |
| NM_021979                        | HSPA2          | heat shock 70 kDa protein 2                                               | 1.714436 | 9.12E-05 |
| NM_001540                        | HSPB1          | heat shock 27 kDa protein 1                                               | 1.613125 | 1.29E-05 |
| NM_004134                        | HSPA9          | heat shock 70 kDa protein 9 (mortalin)                                    | 1.451956 | 0.001334 |
| NM_001136180                     | HSBP1L1        | heat shock factor binding protein 1-like 1                                | 1.418369 | 0.042399 |
| NM_005527                        | HSPA1L         | heat shock 70 kDa protein 1-like                                          | 1.400714 | 0.061484 |
| NM_005527                        | HSPA1L         | heat shock 70 kDa protein 1-like                                          | 1.387241 | 0.375167 |
| NM_006308                        | HSPB3          | heat shock 27 kDa protein 3                                               | 1.348573 | 0.560419 |
| NM_014365                        | HSPB8          | heat shock 22 kDa protein 8                                               | 1.285831 | 0.767025 |
| NM_005526                        | HSF1           | heat shock transcription factor 1                                         | 1.27882  | 0.493407 |
| NM_006644                        | HSPH1          | heat shock 105 kDa/110 kDa protein 1                                      | 1.25894  | 0.094029 |
| NM_005527                        | HSPA1L         | heat shock 70 kDa protein 1-like                                          | 1.252271 | 0.531485 |
| NM_005527                        | HSPA1L         | heat shock 70 kDa protein 1-like                                          | 1.252271 | 0.531485 |
| NM_005527                        | HSPA1L         | heat shock 70 kDa protein 1-like                                          | 1.252271 | 0.531485 |
| NR_002927                        | HSP90AB4P      | heat shock protein 90 kDa alpha (cytosolic), class B member 4, pseudogene | 1.196783 | 0.980903 |
| NM_001080439                     | HSF5           | heat shock transcription factor family member 5                           | 1.159665 | 0.991259 |
| NM_001040667                     | HSF4           | heat shock transcription factor 4                                         | 1.152137 | 0.997202 |
| NM_006948                        | HSPA13         | heat shock protein 70 kDa family, member 13                               | 1.146232 | 0.214137 |
| NM_012267                        | HSPBP1         | HSPA (heat shock 70 kDa) binding protein, cytoplasmic cochaperone 1       | 1.139083 | 0.627941 |
| NM_052970                        | HSPA12B        | heat shock 70kDa protein 12B                                              | 1.13363  | 1        |
| NM_004506                        | HSF2           | heat shock transcription factor 2                                         | 1.105567 | 0.896224 |
| NM_007355                        | HSP90AB1       | heat shock protein 90 kDa alpha (cytosolic), class B member 1             | 1.092565 | 0.95244  |
| NM_007031                        | HSF2BP         | heat shock transcription factor 2 binding protein                         | 1.087694 | 0.976131 |
| NR_003130                        | HSP90B3P       | heat shock protein 90 kDa beta (Grp94), member 3, pseudogene              | 1.072553 | 1        |
| NM_002156                        | HSPD1          | heat shock 60 kDa protein 1 (chaperonin)                                  | -1.08591 | 1        |
| NR_036694                        | HSP90AB3P      | heat shock protein 90 kDa alpha (cytosolic), class B member 3, pseudogene | -1.10607 | 0.908047 |
| NM_144617                        | HSPB6          | heat shock protein, alpha-crystallin-related, B6                          | -1.10629 | 0.879613 |
| NM_006597                        | HSPA8          | heat shock 70 kDa protein 8                                               | -1.12167 | 0.66895  |
| NM_024610                        | HSPBAP1        | HSPB (heat shock 27 kDa) associated protein 1                             | -1.16834 | 0.699368 |
| NM_025015                        | HSPA12A        | heat shock 70 kDa protein 12A                                             | -1.17539 | 0.832846 |
| ENST00000194214                  | HSPB11         | heat shock protein family B (small), member 11                            | -1.19177 | 0.770917 |
| BC041412                         | HSPA12A        | heat shock 70 kDa protein 12A                                             | -1.26006 | 0.686941 |
| ENST00000378372                  | HSPA14         | heat shock 70 kDa protein 14                                              | -1.44767 | 0.297435 |
| ENST00000304858                  | HSPA4          | heat shock 70 kDa protein 4                                               | -1.891   | 3.77E-06 |



**Supplementary Table 4.** Primer sequences for RT-PCR.

| Primer Sequence |                      |                      |          |                       |
|-----------------|----------------------|----------------------|----------|-----------------------|
| Name            | Forward: 5' → 3'     | Reverse: 5' → 3'     | Expected | Annealing Temperature |
| β-actin         | GGACTTCGAGCAAGAGATGG | AGCACTGTGTTGGCGTACAG | 234 bp   | 57.5°C                |
| VEGFa           | CCTTGCTGCTCTACCAC    | ATCTGCATGGTGATGTTGGA | 280 bp   | 59.0°C                |
| N-Ras           | CTGTGGTCCTAAATCTGTCC | CAGTGCAGCTTGAAAGTG   | 682 bp   | 53°C                  |
| EGFR            | CAGGGCATTTCACAGGTGCG | TCAGGTTACAGGGCACACAC | 229 bp   | 58.5°C                |
| p53             | GCGTGTGGAGTATTTGGA   | GAGAGGAGCTGGTGTTGT   | 344 bp   | 53°C                  |
| TGF-β1          | TGRCACCGGAGTTGTGCG   | GGCCGGTAGTGAACCCGT   | 131 bp   | 55°C                  |

**Supplementary Table 5.** Comparison of colony formation by control and co-cultured MSCs.

| Control MSC-A 8wk |                       | MSC-NCF 8wk     |                       | MSC-CRC 8wk     |                       |
|-------------------|-----------------------|-----------------|-----------------------|-----------------|-----------------------|
| Number of cells   | Colony formation/well | Number of cells | Colony formation/well | Number of cells | Colony formation/well |
| $2 \times 10^6$   | 0/6                   | $2 \times 10^6$ | 0/6                   | $2 \times 10^6$ | 6/6                   |
| $2 \times 10^5$   | 0/6                   | $2 \times 10^5$ | 0/6                   | $2 \times 10^5$ | 0/6                   |
| $2 \times 10^4$   | 0/6                   | $2 \times 10^4$ | 0/6                   | $2 \times 10^4$ | 0/6                   |

**NOTE. Number of colony formations/number of well**

Soft Agar Assays were performed in 6-well plates. After 21 days of growth, colonies > 100  $\mu\text{m}$  in diameter were counted using a microscope.
